# Supplementary material for: Efficient Separation of Phytochemicals from Muehlenbeckia volcanica (Benth.) Endl. by Polarity-Stepwise Elution Counter-Current Chromatography and Their Antioxidant, Antiglycation, and Aldose Reductase Inhibition Potentials
Source: MDPI journal article supplement (doi:10.3390/molecules26010224), 2021-01-04
Supplement: s1 [file s1]

## *Supplementary Materials*

# **Efficient Separation of Phytochemicals from *Muehlenbeckia volcanica* (Benth.) Endl. by Polarity- Stepwise Elution Counter-Current Chromatography and their Antioxidant, Antiglycation, and Aldose Reductase Inhibition Potentials**

Guang-Lei Zuo <sup>1</sup>, Hyun Yong Kim <sup>1</sup>, Yanymee N. Guillen Quispe <sup>1,2,3</sup>, Zhi-Qiang Wang <sup>1,4</sup>,  
Seung Hwan Hwang <sup>1,5</sup>, Kyong-Oh Shin <sup>1</sup> and Soon Sung Lim <sup>1,6,7,\*</sup>

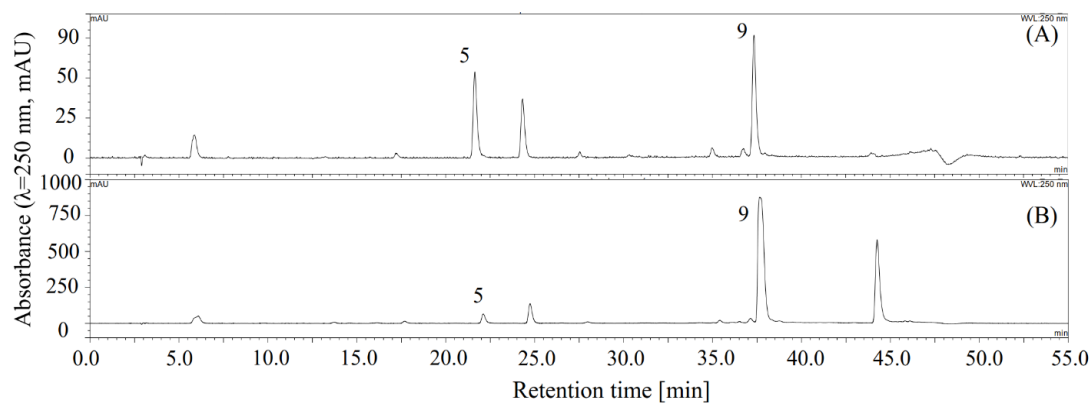

**Figure S1.** HPLC chromatograms of the compound **5**-containing mixture. (A) HPLC chromatogram of the freshly obtained compound **5**-containing CCC fraction. (B) Compound **5** degraded during preservation at 4 °C.

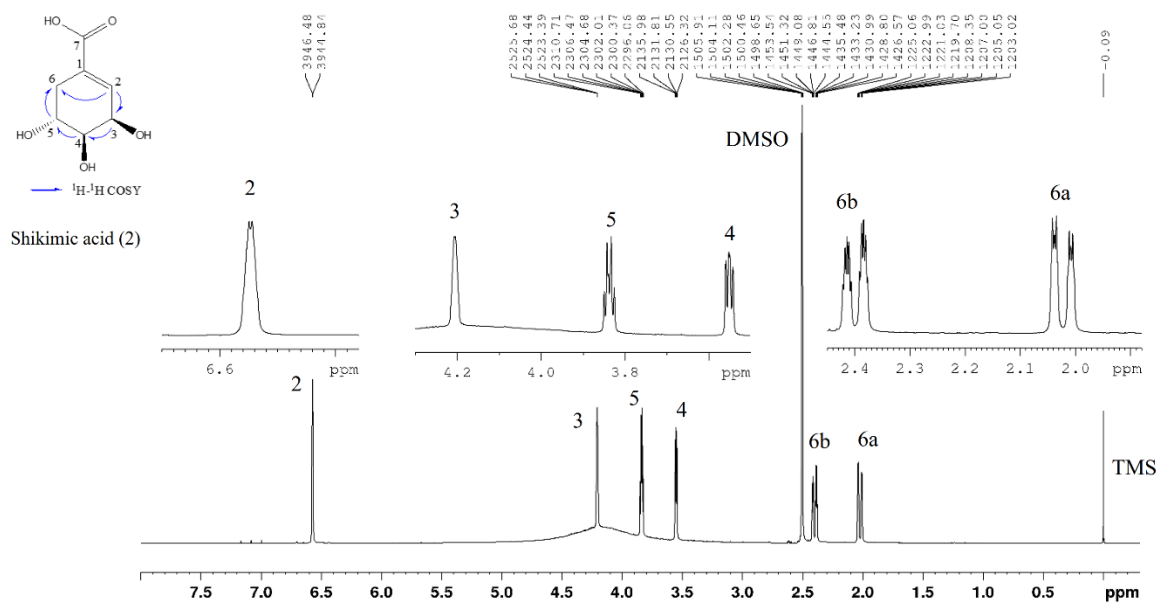

**Figure S2-1.**  $^1\text{H}$ -NMR (600 MHz,  $\text{DMSO}-d_6$ ) spectroscopy of shikimic acid (**2**) from plant *Muehlenbeckia volcanica* (Benth.) Endl.

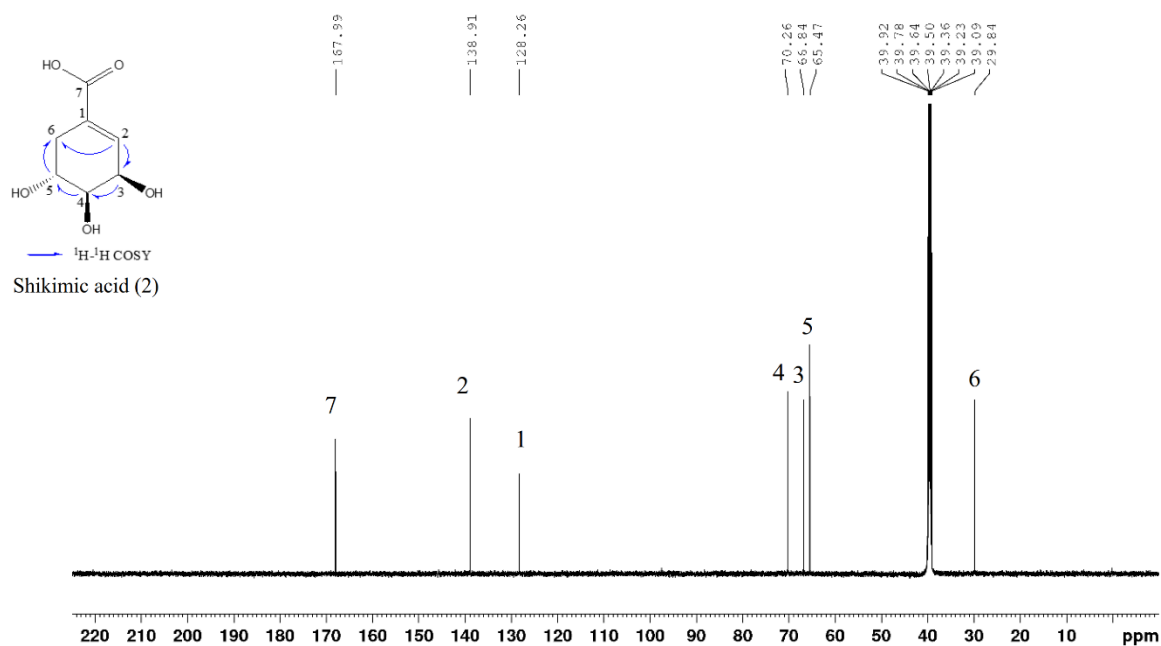

**Figure S2-2.**  $^{13}\text{C}$ -NMR (150 MHz,  $\text{DMSO}-d_6$ ) spectroscopy of shikimic acid (2) from plant *Muehlenbeckia volcanica* (Benth.) Endl.

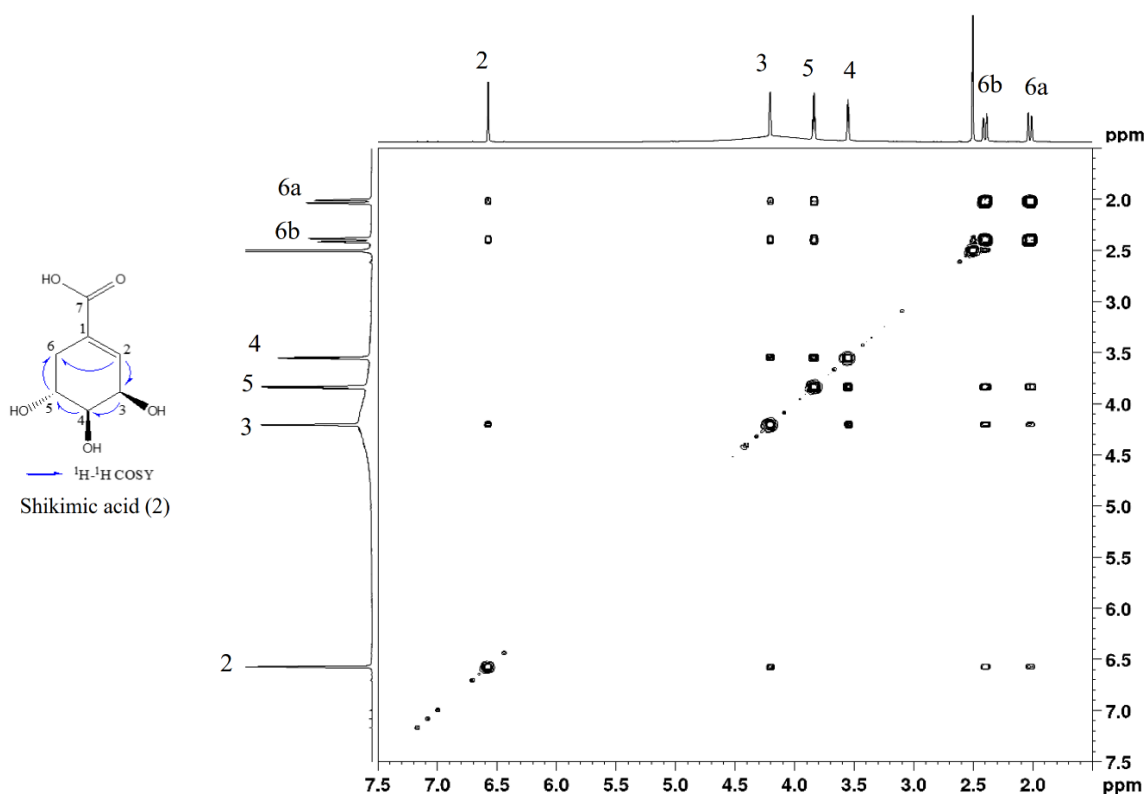

**Figure S2-3.**  $^1\text{H}$ - $^1\text{H}$  COSY NMR (600 MHz,  $\text{DMSO}-d_6$ ) spectroscopy of shikimic acid (2) from plant *Muehlenbeckia volcanica* (Benth.) Endl.

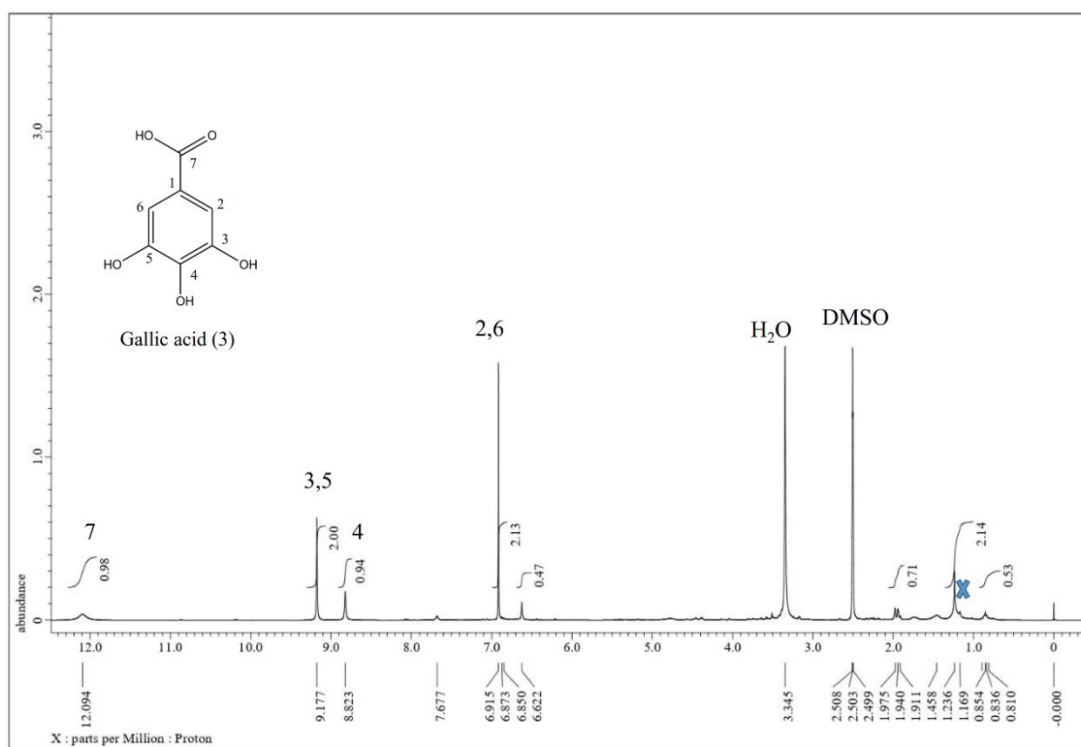

**Figure S3.**  $^1\text{H}$  NMR (400 MHz, DMSO- $d_6$ ) spectroscopy of gallic acid (3) from plant *Muehlenbeckia v olcanica* (Benth.) Endl.

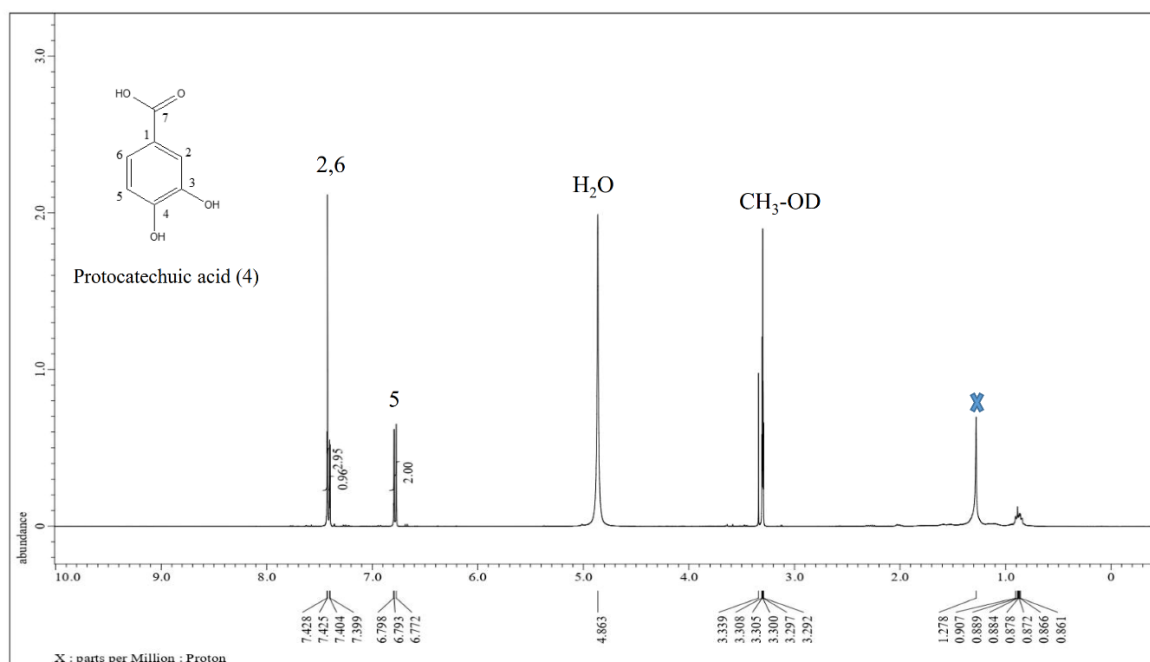

**Figure S4-1.**  $^1\text{H}$  NMR (400 MHz, MeOD- $d_4$ ) spectroscopy of protocatechuic acid (4) from plant *Muehlenbeckia volcanica* (Benth.) Endl.

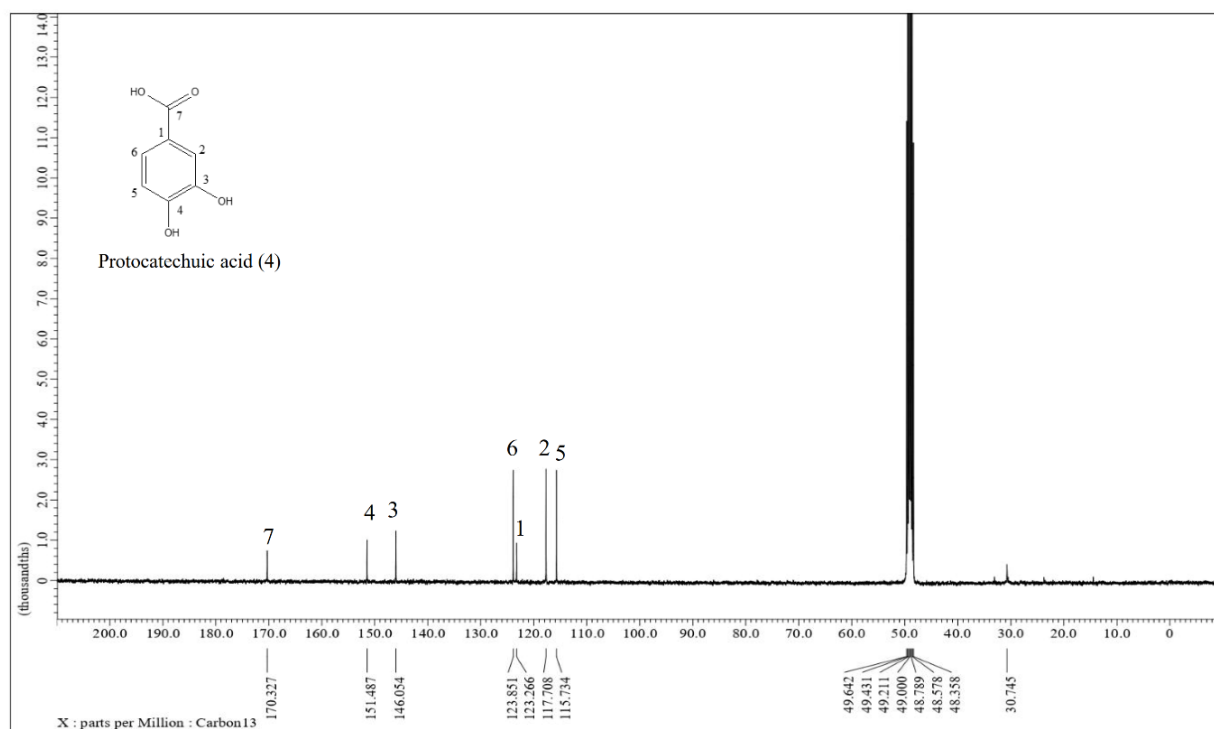

**Figure S4-2.** <sup>13</sup>C NMR (100 MHz, MeOD-*d*<sub>4</sub>) spectroscopy of protocatechuic acid (4) from plant *Muehlenbeckia volcanica* (Benth.) Endl.

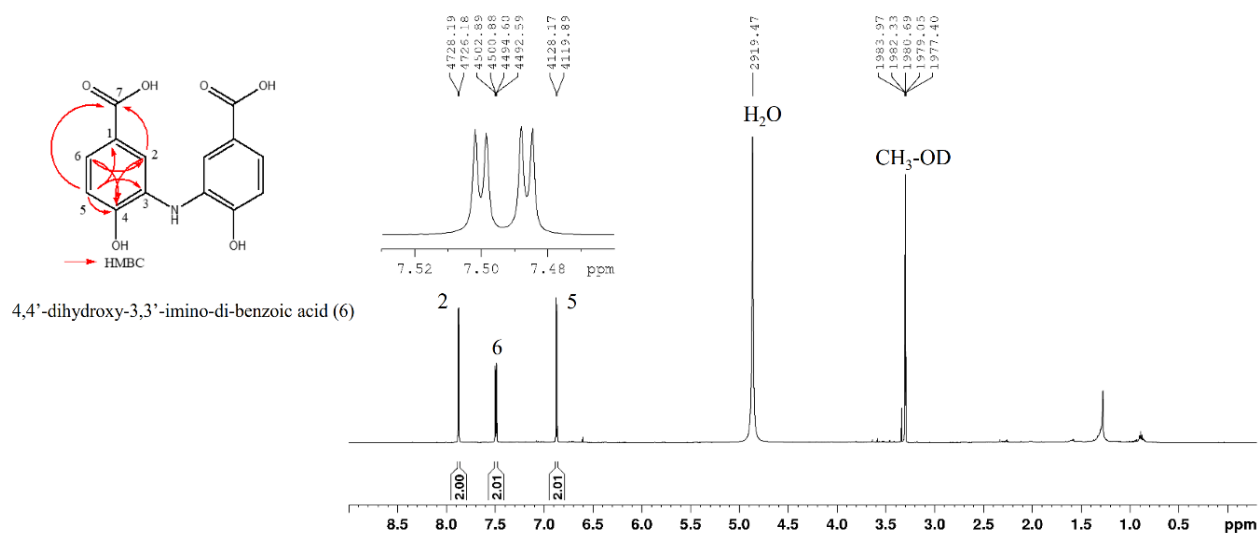

**Figure S5-1.** <sup>1</sup>H NMR (600 MHz, MeOD-*d*<sub>4</sub>) spectroscopy of 4,4'-dihydroxy-3,3'-imino-di-benzoic acid (6) from plant *Muehlenbeckia volcanica* (Benth.) Endl.

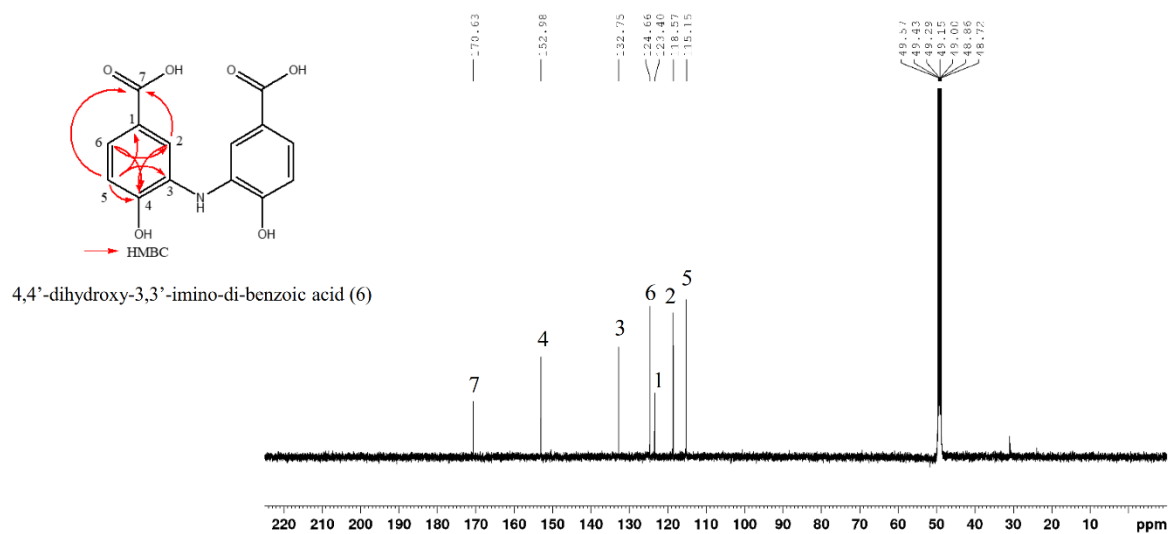

**Figure S5-2.**  $^{13}\text{C}$  NMR (150 MHz,  $\text{MeOD-}d_4$ ) spectroscopy of 4,4'-dihydroxy-3,3'-imino-di-benzoic acid (6) from plant *Muehlenbeckia volcanica* (Benth.) Endl.

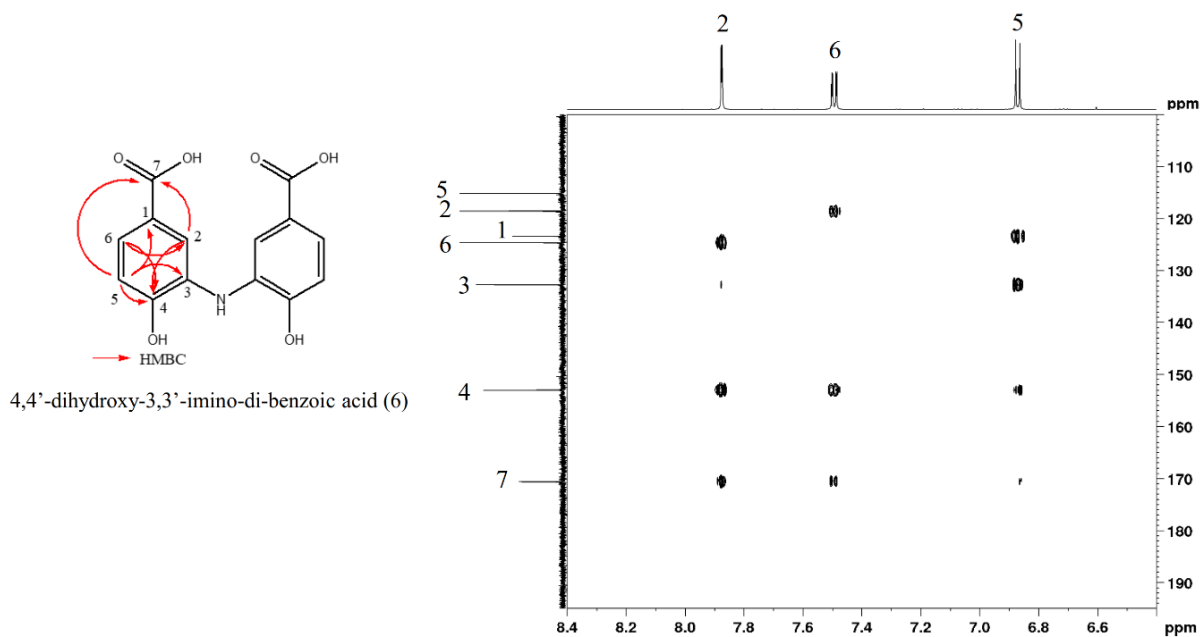

**Figure S5-3.** HMBC NMR spectroscopy of 4,4'-dihydroxy-3,3'-imino-di-benzoic acid (6) from plant *Muehlenbeckia volcanica* (Benth.) Endl.

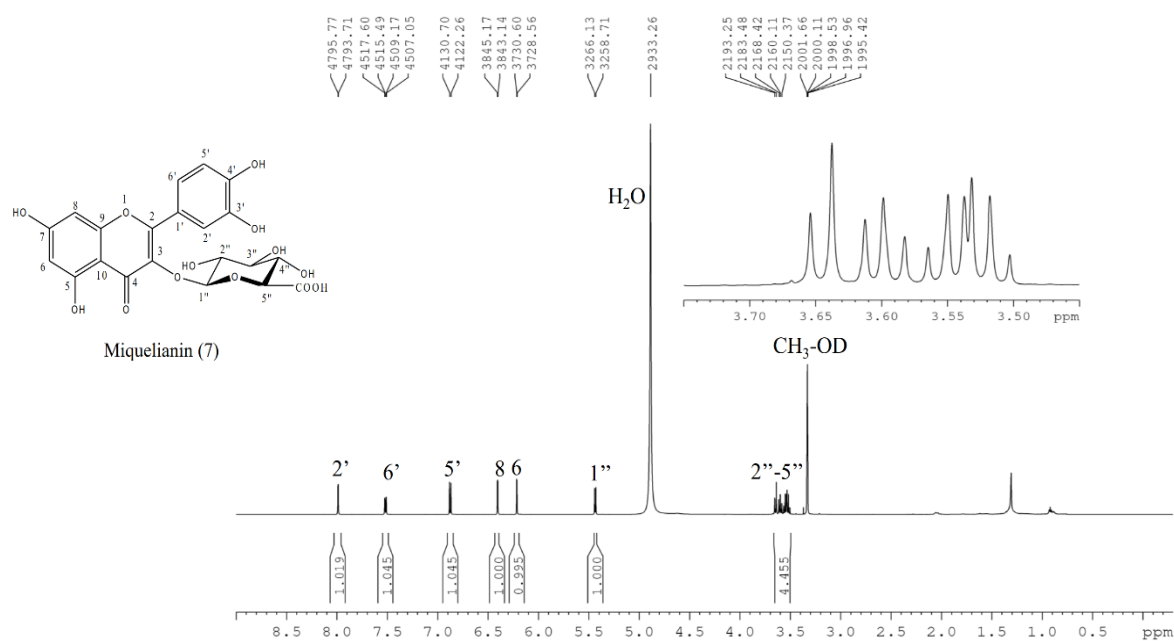

**Figure S6.**  $^1\text{H}$  NMR (600 MHz,  $\text{MeOD-}d_4$ ) spectroscopy of miquelianin (**7**) from plant *Muehlenbeckia volcanica* (Benth.) Endl.

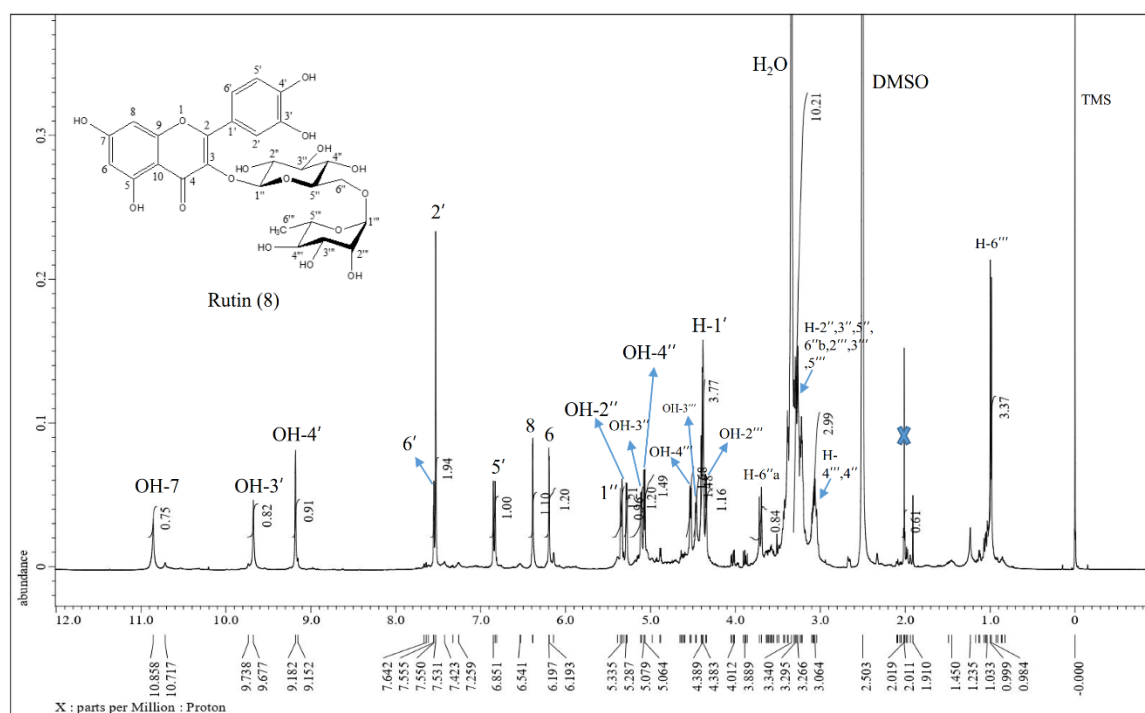

**Figure S7.**  $^1\text{H}$  NMR (400 MHz,  $\text{DMSO-}d_6$ ) spectroscopy of rutin (**8**) from plant *Muehlenbeckia volcanica* (Benth.) Endl.

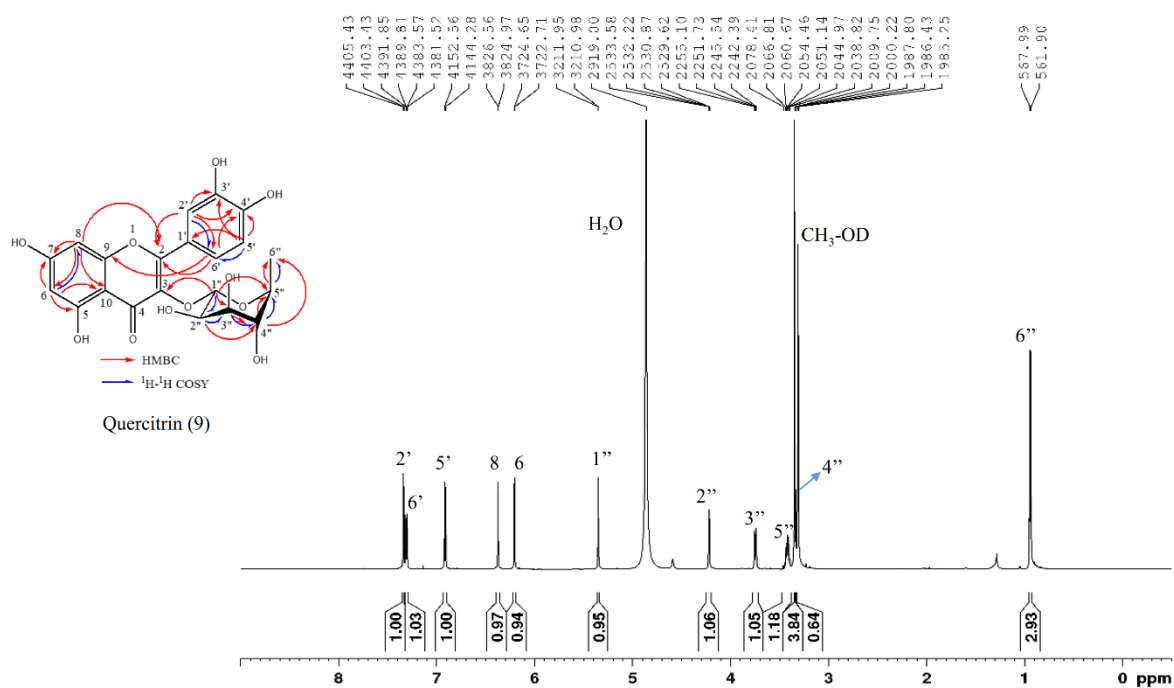

**Figure S8-1.**  $^1\text{H}$  NMR (600 MHz,  $\text{MeOD-}d_4$ ) spectroscopy of quercitrin (**9**) from plant *Muehlenbeckia volcanica* (Benth.) Endl.

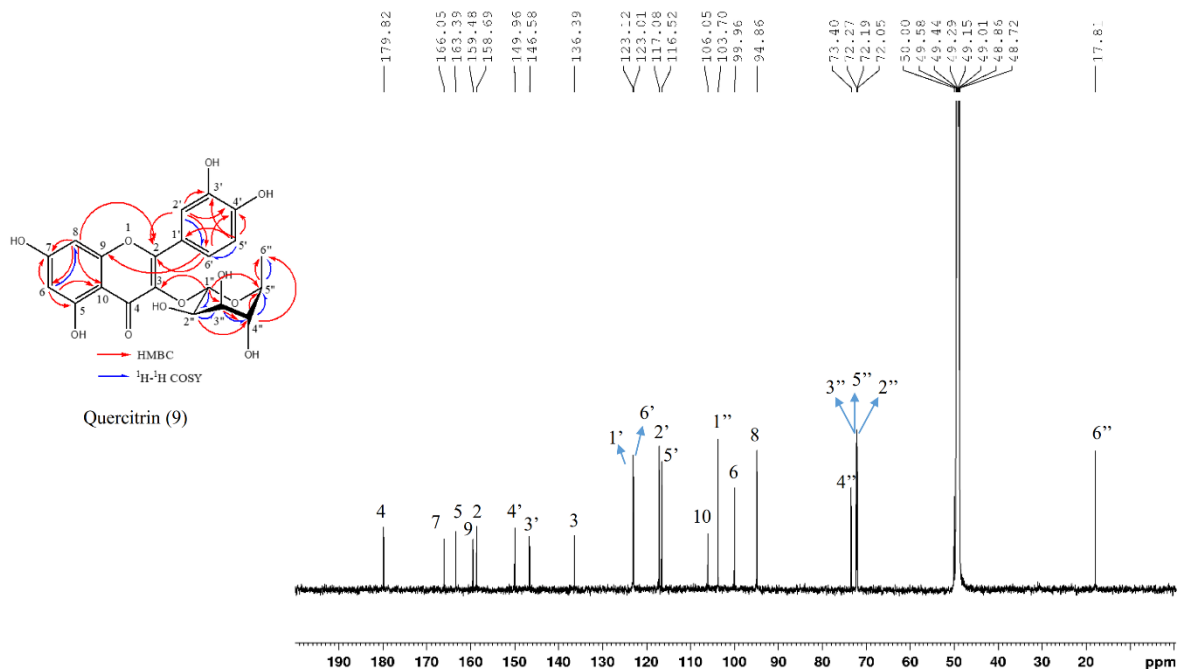

**Figure S8-2.**  $^{13}\text{C}$  NMR (150 MHz,  $\text{MeOD-}d_4$ ) spectroscopy-1 of quercitrin (**9**) from plant *Muehlenbeckia a volcanica* (Benth.) Endl.



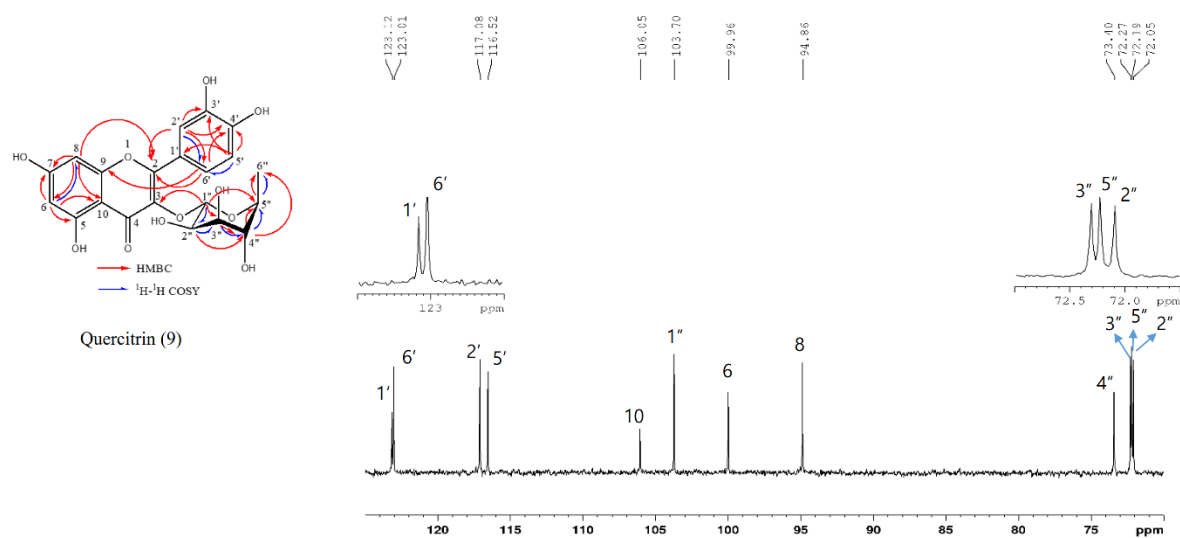

**Figure S8-3.**  $^{13}\text{C}$  NMR (150 MHz, MeOD- $d_4$ ) spectroscopy-2 of quercitrin (9) from plant *Muehlenbeckia a volcanica* (Benth.) Endl.

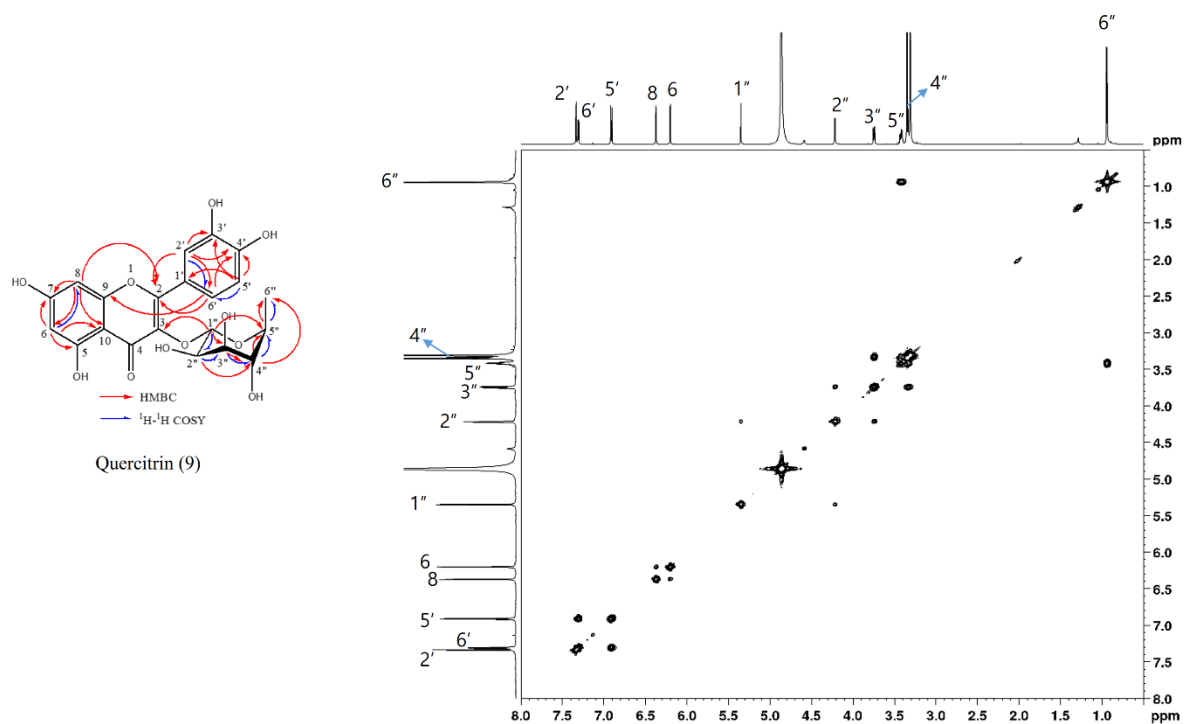

**Figure S8-4.**  $^1\text{H}$ - $^1\text{H}$  COSY NMR (600 MHz, MeOD- $d_4$ ) spectroscopy of quercitrin (9) from plant *Muehlenbeckia a volcanica* (Benth.) Endl.

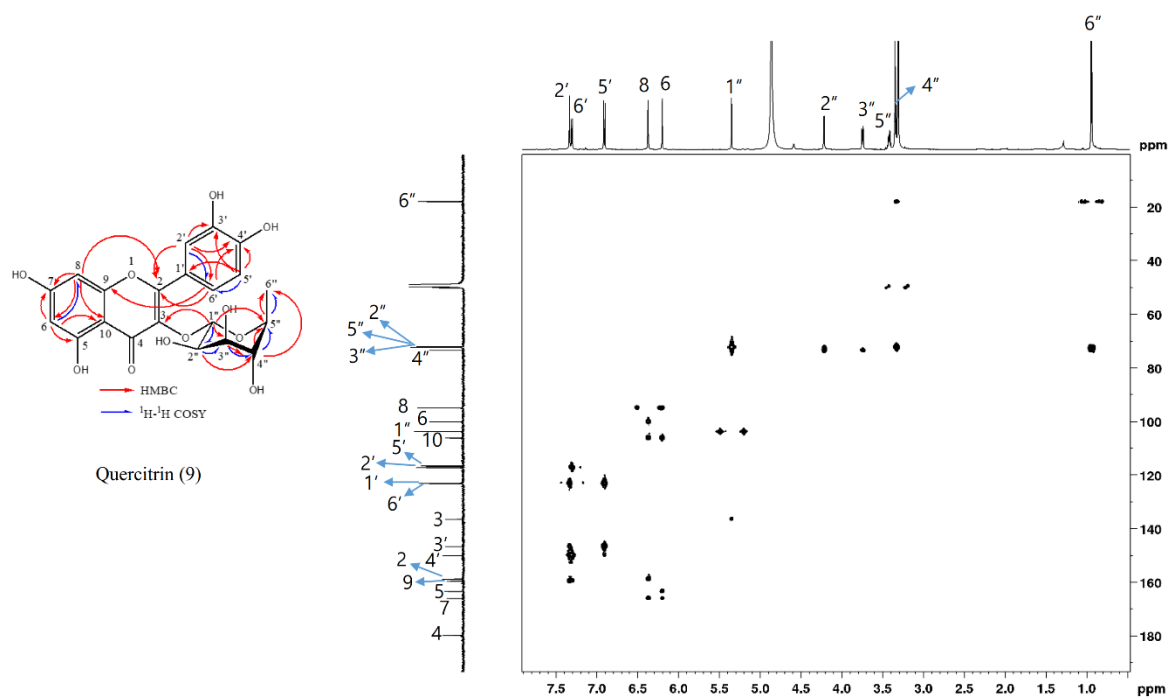

**Figure S8-5.** HMBC NMR spectroscopy of quercitrin (9) from plant *Muehlenbeckia volcanica* (Benth.) Endl.

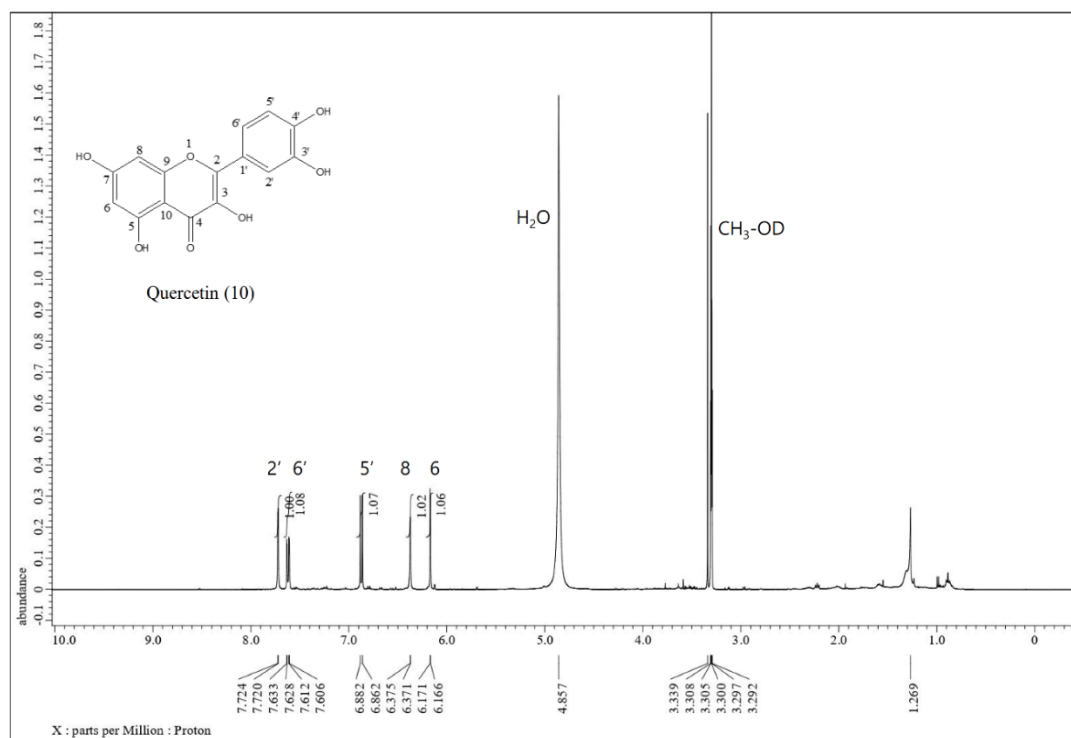

**Figure S9.**  $^1\text{H}$  NMR (400 MHz, MeOD- $d_4$ ) spectroscopy of quercetin (10) from plant *Muehlenbeckia volcanica* (Benth.) Endl.

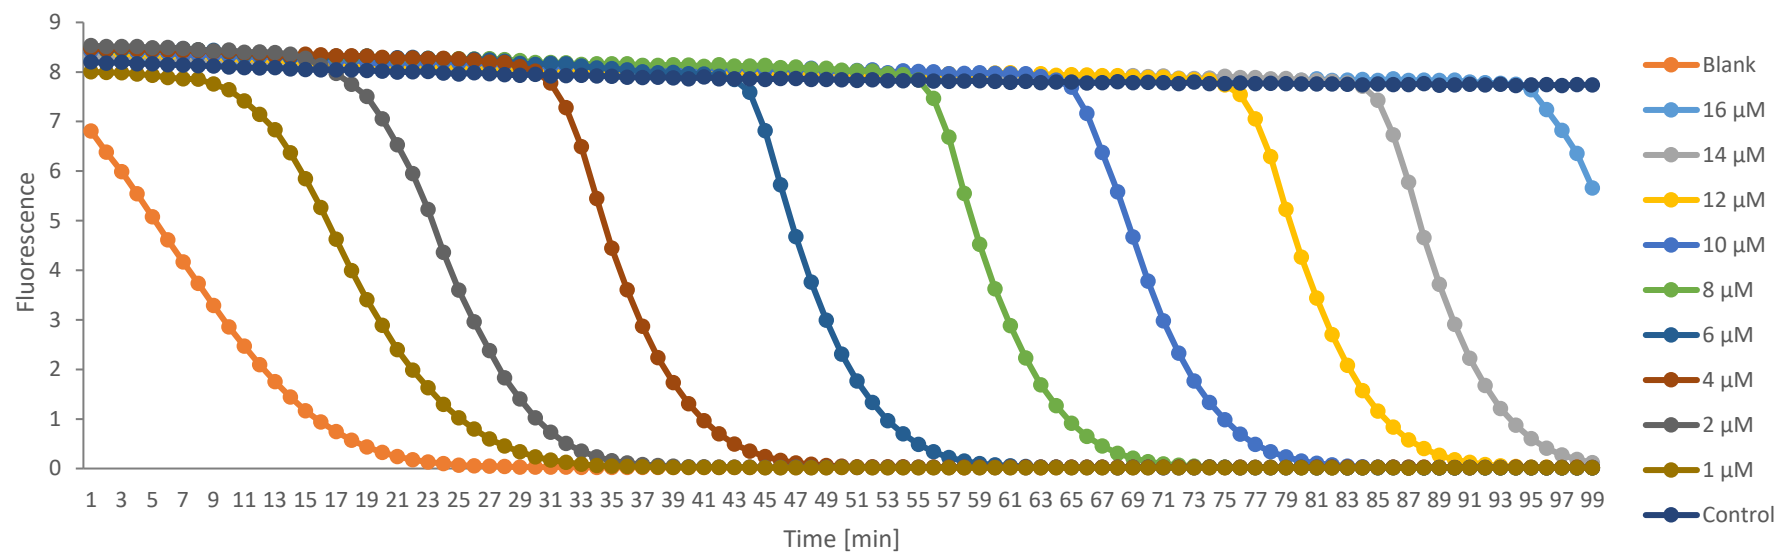

**Figure S10-1.** Fluorescein fluorescence decay curve induced by AAPH in the presence of trolox, 1-16  $\mu\text{M}$ , or in the absence of trolox (Blank group). Where as Control group represents the fluorescein fluorescence decay curve without addition of AAPH or trolox.

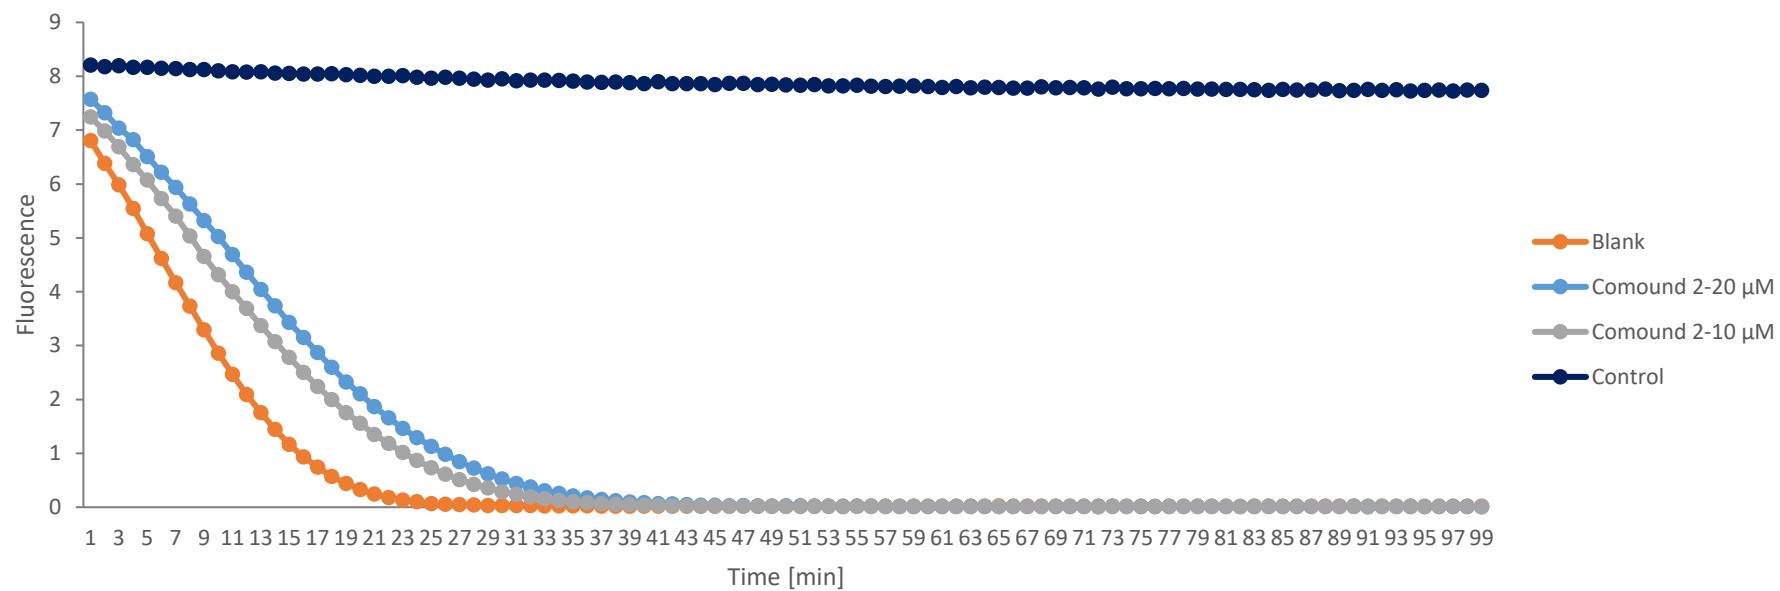

**Figure S10-2.** Fluorescein fluorescence decay curve induced by AAPH in the presence of shikimic acid (compound **2**, 10 and 20  $\mu$ M), or in the absence of antioxidants (Blank group). Whereas Control group represents the fluorescein fluorescence decay curve without addition of AAPH or antioxidants.

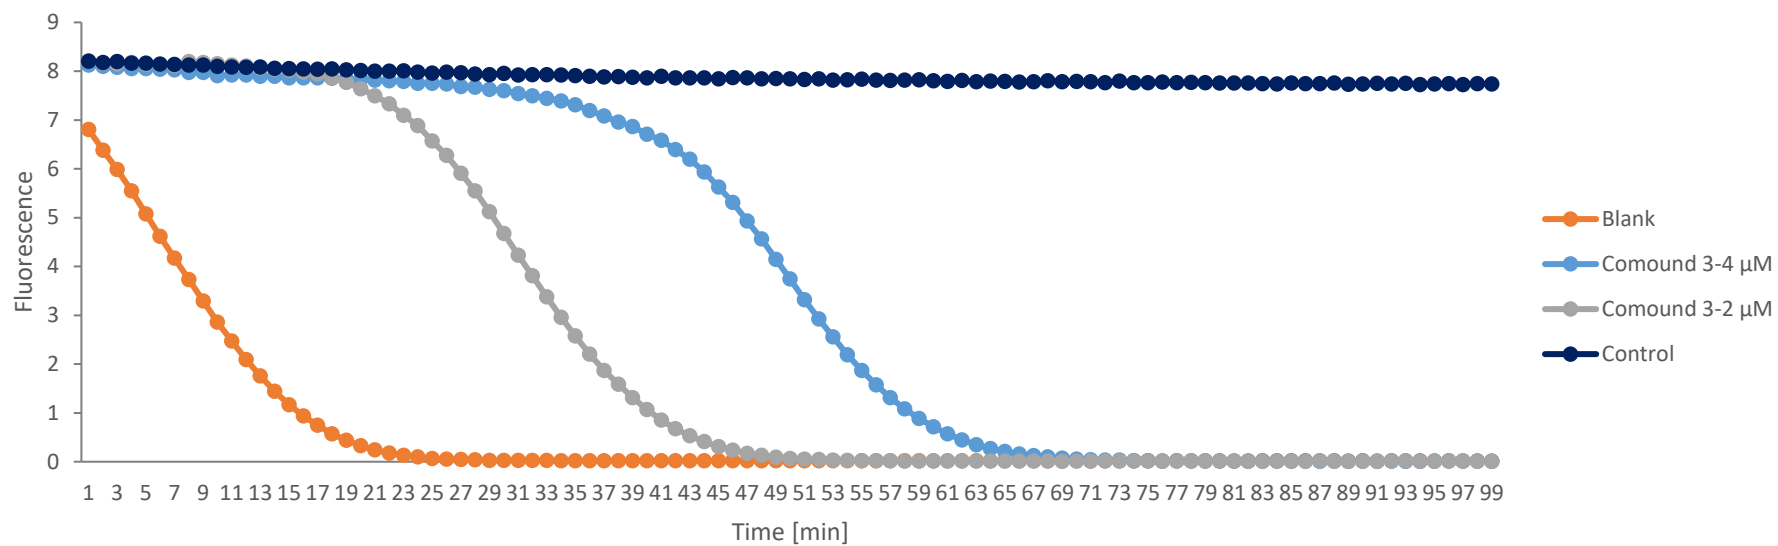

**Figure S10-3.** Fluorescein fluorescence decay curve induced by AAPH in the presence of gallic acid (compound **3**, 2 and 4  $\mu\text{M}$ ), or in the absence of antioxidants (Blank group). Whereas Control group represents the fluorescein fluorescence decay curve without addition of AAPH or antioxidants.

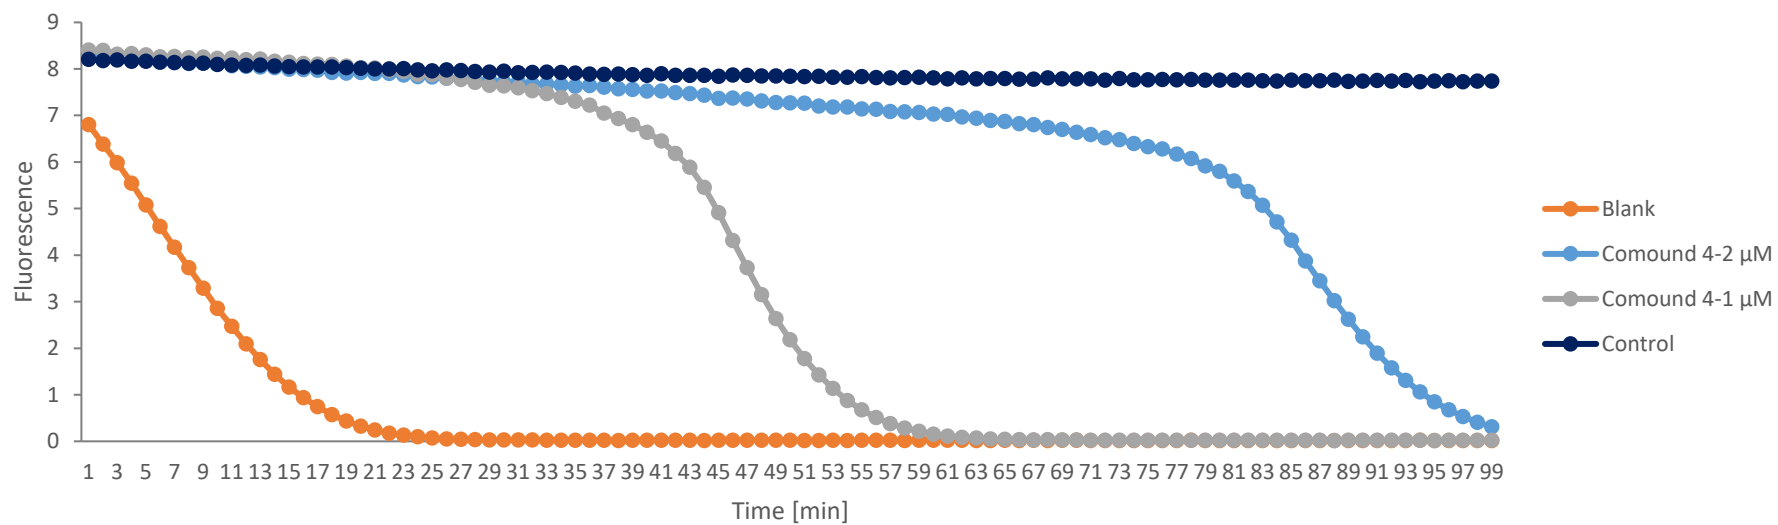

**Figure S10-4.** Fluorescein fluorescence decay curve induced by AAPH in the presence of protocatechuic acid (compound 4, 1 and 2  $\mu\text{M}$ ), or in the absence of antioxidants (Blank group). Whereas Control group represents the fluorescein fluorescence decay curve without addition of AAPH or antioxidants.

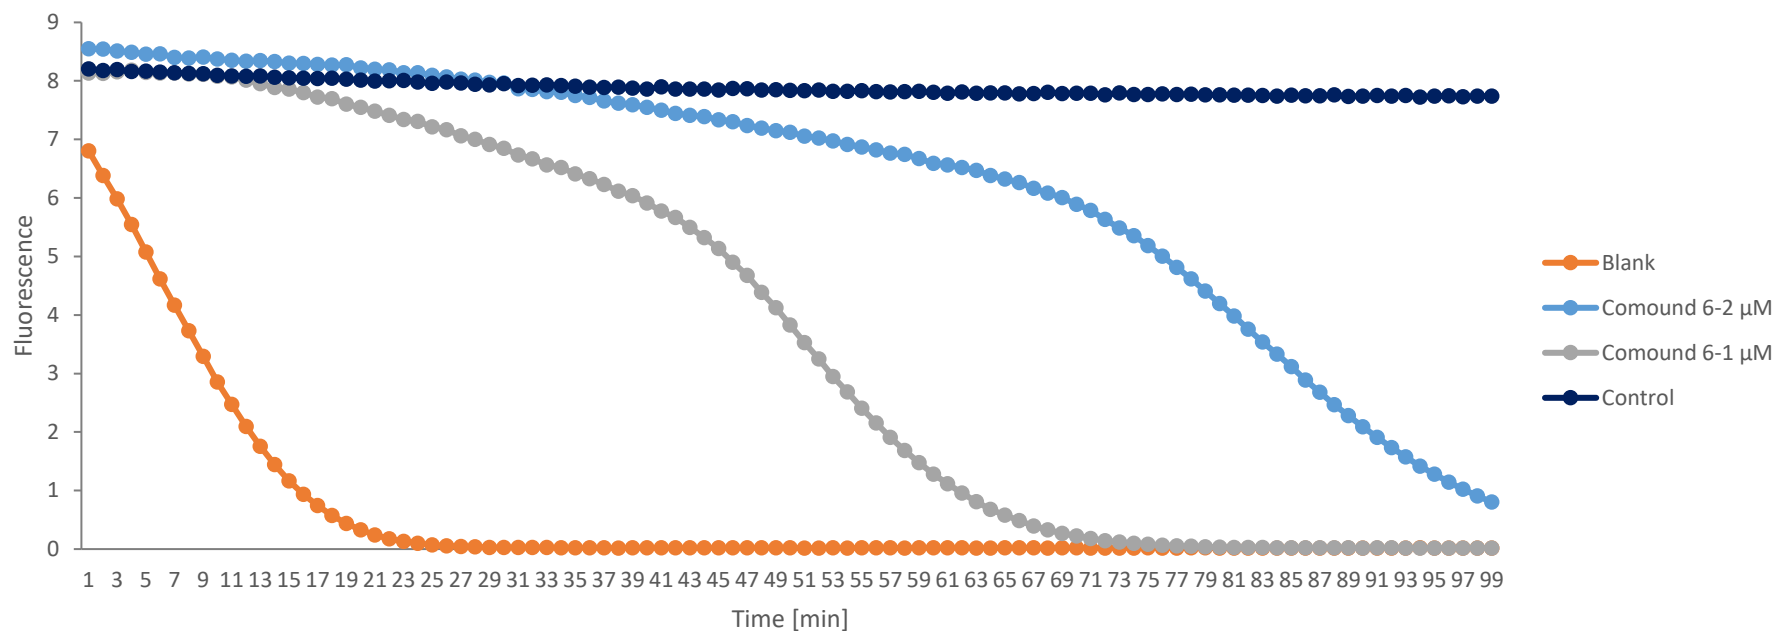

**Figure S10-5.** Fluorescein fluorescence decay curve induced by AAPH in the presence of 4,4'-dihydroxy-3,3'-imino-di-benzoic acid (compound **6**, 1 and 2  $\mu$  M), or in the absence of antioxidants (Blank group). Whereas Control group represents the fluorescein fluorescence decay curve without addition of AAPH or antioxidants.

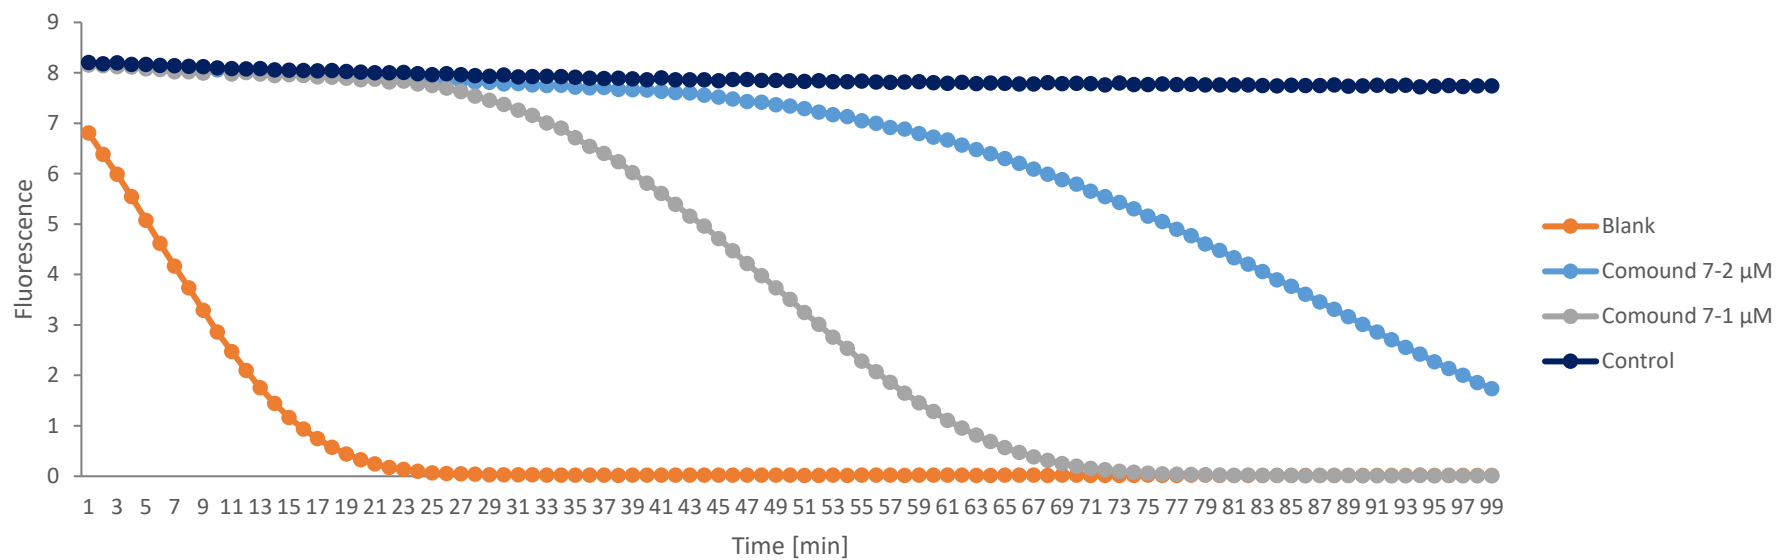

**Figure S10-6.** Fluorescein fluorescence decay curve induced by AAPH in the presence of miquelianin (compound 7, 1 and 2  $\mu\text{M}$ ), or in the absence of antioxidants (Blank group). Whereas Control group represents the fluorescein fluorescence decay curve without addition of AAPH or antioxidants.



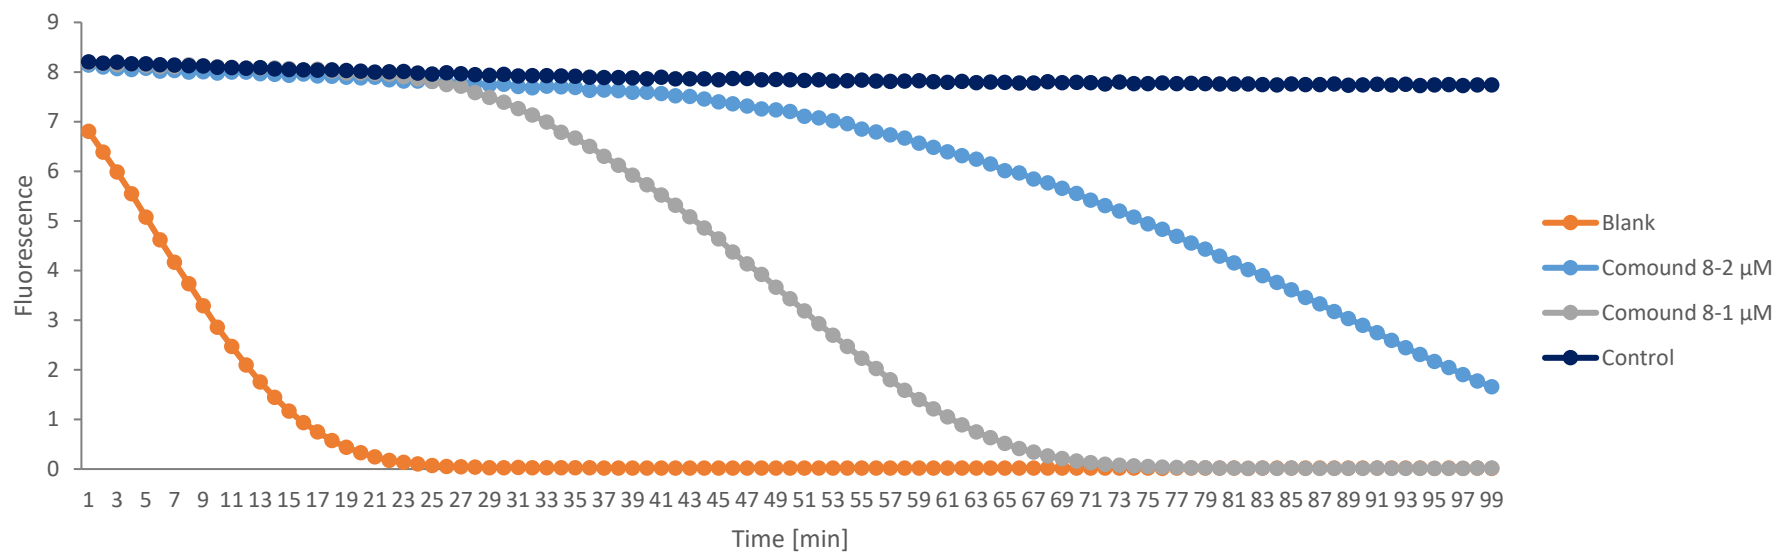

**Figure S10-7.** Fluorescein fluorescence decay curve induced by AAPH in the presence of rutin (compound **8**, 1 and 2  $\mu\text{M}$ ), or in the absence of antioxidants (Blank group). Whereas Control group represents the fluorescein fluorescence decay curve without addition of AAPH or antioxidants.

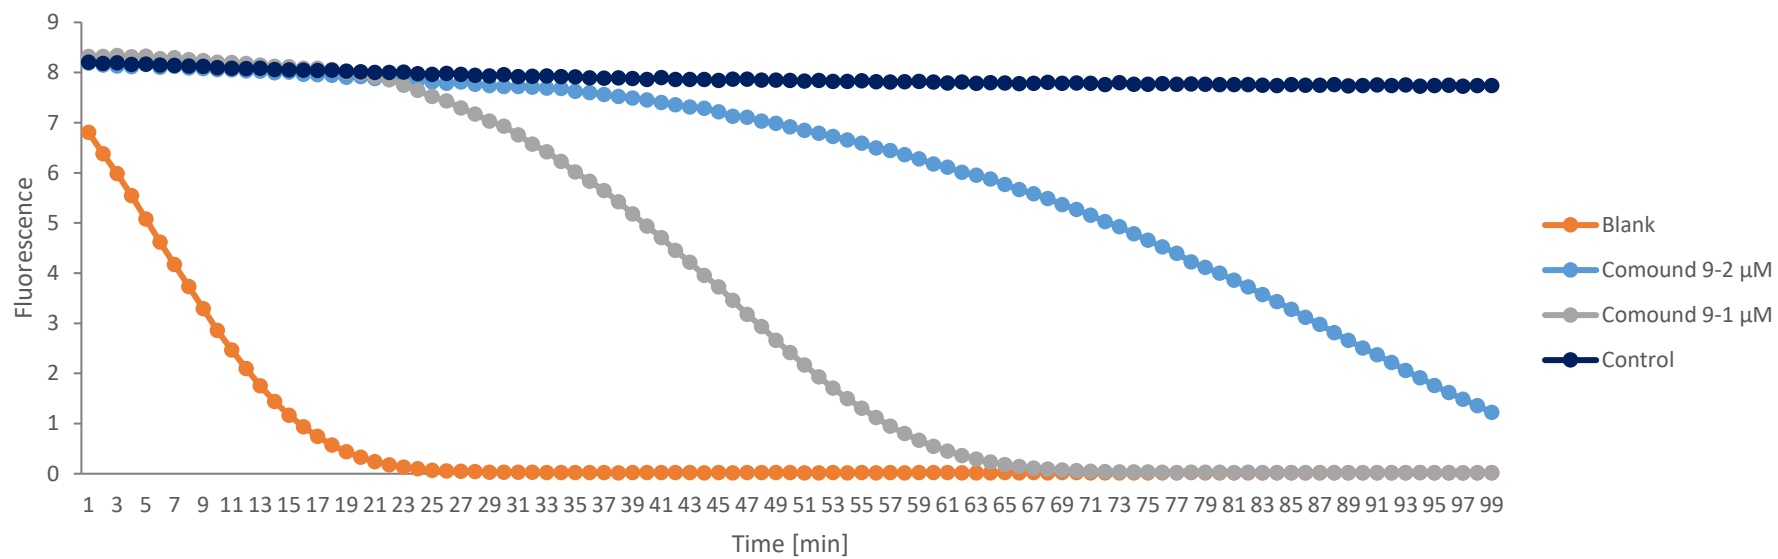

**Figure S10-8.** Fluorescein fluorescence decay curve induced by AAPH in the presence of quercitrin (compound 9, 1 and 2  $\mu$ M), or in the absence of antioxidants (Blank group). Whereas Control group represents the fluorescein fluorescence decay curve without addition of AAPH or antioxidants.

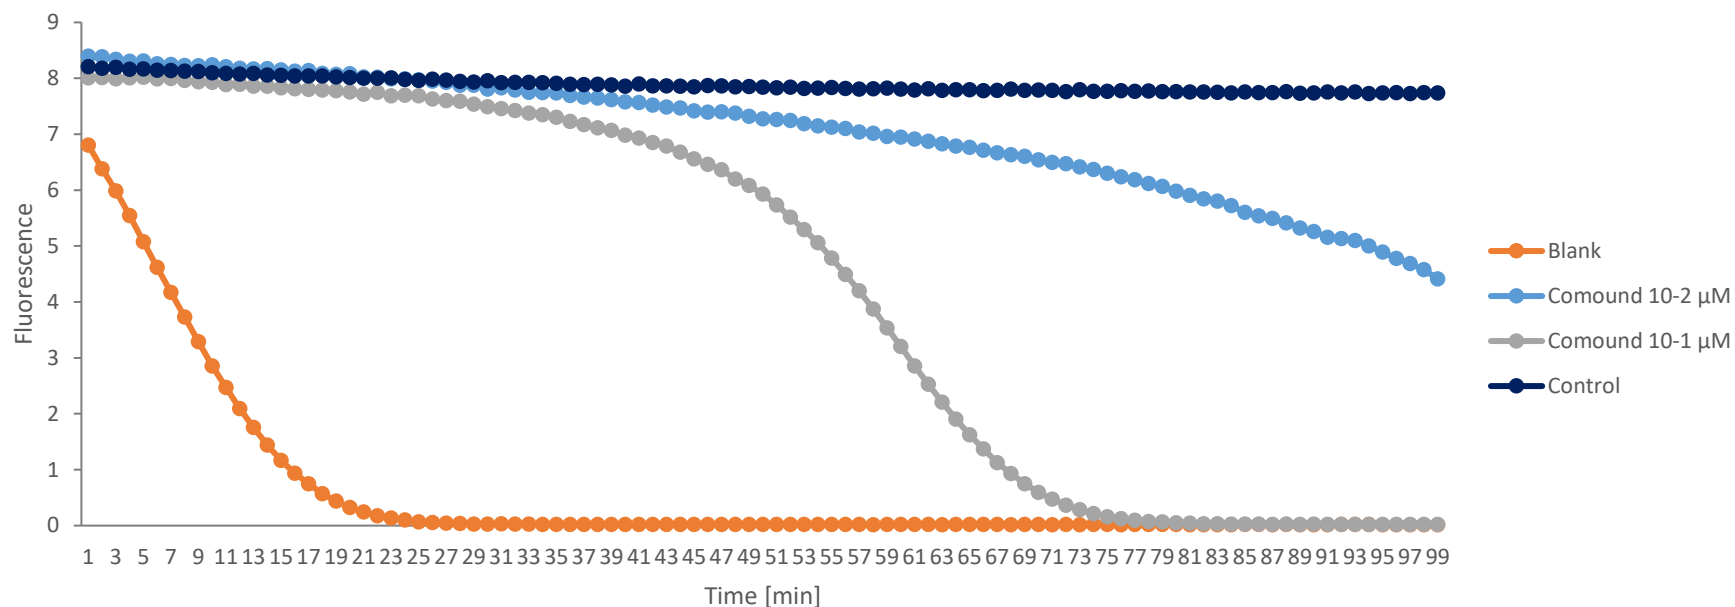

**Figure S10-9.** Fluorescein fluorescence decay curve induced by AAPH in the presence of quercetin (compound **10**, 1 and 2  $\mu\text{M}$ ), or in the absence of antioxidants (Blank group). Whereas Control group represents the fluorescein fluorescence decay curve without addition of AAPH or antioxidants.

**Table S1.** Partition coefficients ( $K_{\text{upper/lower}}$ ) of compounds **1-10** from the 70% methanol extract of *Muehlenbeckia volcanica* (Benth.) Endl. at a series of *n*-hexane/ethyl acetate/methanol/*n*-butanol/water solvent systems.

| Solvent system                              | $K$ values |      |             |      |             |      |      |      |             |
|---------------------------------------------|------------|------|-------------|------|-------------|------|------|------|-------------|
|                                             | 1&2        | 3    | 4           | 5    | 6           | 7    | 8    | 9    | 10          |
| <i>n</i> -Hexane/EA/MeOH/water 4:5:4:5, v/v | 0.02       | 0.02 | 0.09        | 0.01 | 0.04        | 0.00 | 0.00 | 0.02 | <b>0.78</b> |
| <i>n</i> -Hexane/EA/MeOH/water 3:5:3:5, v/v | 0.02       | 0.09 | 0.29        | 0.07 | 0.27        | 0.01 | 0.01 | 0.12 | 2.91        |
| <i>n</i> -Hexane/EA/MeOH/water 2:5:2:5, v/v | 0.02       | 0.18 | <b>0.75</b> | 0.33 | <b>1.12</b> | 0.04 | 0.03 | 0.45 | 8.76        |

|                                             |      |             |      |             |       |             |             |             |       |
|---------------------------------------------|------|-------------|------|-------------|-------|-------------|-------------|-------------|-------|
| <i>n</i> -Hexane/EA/MeOH/water 1:5:1:5, v/v | 0.02 | 0.44        | 1.62 | <b>1.18</b> | 4.58  | 0.11        | 0.10        | <b>1.21</b> | 8.14  |
| EA/water 5:5, v/v                           | 0.05 | <b>1.33</b> | 3.67 | 5.31        | 16.34 | 0.28        | 0.31        | 3.40        | 15.19 |
| EA/ <i>n</i> -BuOH/water 4:1:5, v/v         | 0.07 | 2.79        | 8.32 | 32.90       | 29.05 | <b>1.42</b> | <b>1.50</b> | 12.92       | 32.48 |
| EA/ <i>n</i> -BuOH/water 3:2:5, v/v         | 0.09 | 5.22        | 9.32 | 70.27       | 54.42 | 3.57        | 3.87        | 22.26       | 44.55 |
| EA/ <i>n</i> -BuOH/water 2:3:5, v/v         | 0.20 | 6.58        | 8.65 | 41.31       | 54.04 | 4.36        | 5.33        | 15.94       | 31.91 |
| <i>n</i> -BuOH/water 5:5, v/v               | 0.32 | 5.84        | 8.51 | 40.91       | 32.41 | 5.44        | 6.65        | 12.77       | 29.64 |

EA: ethyl acetate; MeOH: methanol; water: ultrapure water; *n*-BuOH: *n*-butanol. All *n*-BuOH used in this study has been pre-saturated using ultrapure water.

**Table S2.** Structural assignment of the separated compounds from the 70% methanol extract of *Muehlenbeckia vulcanica* Meisn. using NMR, MS, and UV analysis.

| Peak number | UV ( $\lambda_{\text{max}}$ , nm) by HPLC | EI-MS $m/z$ (abundance)                     | LC-ESI-MS $m/z$                        | Formula (molecular weight)                          | $^1\text{H}$ NMR, $\delta$ (ppm)                                                                                                                                                                                                                                                                                                                         | $^{13}\text{C}$ NMR, $\delta$ (ppm)                                                                                                                            | Structural assignment <sup>a</sup> |
|-------------|-------------------------------------------|---------------------------------------------|----------------------------------------|-----------------------------------------------------|----------------------------------------------------------------------------------------------------------------------------------------------------------------------------------------------------------------------------------------------------------------------------------------------------------------------------------------------------------|----------------------------------------------------------------------------------------------------------------------------------------------------------------|------------------------------------|
| 2           | <sup>-b</sup>                             | -                                           | negative ion: 172.6 [M-H] <sup>-</sup> | C <sub>7</sub> H <sub>10</sub> O <sub>5</sub> (174) | 600 MHz (DMSO- <i>d</i> <sub>6</sub> ) $\delta_{\text{H}}$ : 6.57 (1H, d, <i>J</i> = 1.64 Hz, 2-H), 4.20-4.21 (1H, m, 3-H), 3.84 (1H, dd, <i>J</i> = 10.40 Hz, 4.27 Hz, 5-H), 3.55 (1H, dd, <i>J</i> = 5.43 Hz, 4.20 Hz, 4-H), 2.40 (1H, ddt, <i>J</i> = 18.01 Hz, 4.52 Hz, 2.22 Hz, 6a-H), 2.02 (1H, ddt, <i>J</i> = 18.06 Hz, 4.03 Hz, 2.03 Hz, 6b-H). | 150 MHz (DMSO- <i>d</i> <sub>6</sub> ) $\delta_{\text{C}}$ : 168.0 (C-7), 138.9 (C-2), 128.3 (C-1), 70.3 (C-4), 66.8 (C-5), 65.5 (C-3), 29.8 (C-6).            | Shikimic acid                      |
| 3           | 234, 270                                  | 170 (100.00%), 153 (99.57%), 125 (54.07%)   | negative ion: 169.1 [M-H] <sup>-</sup> | C <sub>7</sub> H <sub>6</sub> O <sub>5</sub> (170)  | 400 MHz (DMSO- <i>d</i> <sub>6</sub> ) $\delta_{\text{H}}$ : 12.10 (1H, br s, COOH), 9.18 (2H, s, 2-OH), 8.82 (1H, s, 3-OH), 6.92 (2H, s, 1-H).                                                                                                                                                                                                          | -                                                                                                                                                              | Gallic acid                        |
| 4           | 258, 294                                  | 154 (95%), 137 (96%), 109 (100%), 81 (38%). | negative ion: 153.0 [M-H] <sup>-</sup> | C <sub>7</sub> H <sub>6</sub> O <sub>4</sub> (154)  | 400 MHz (MeOD- <i>d</i> <sub>4</sub> ) $\delta_{\text{H}}$ : 7.43 (1H, d, <i>J</i> = 2.4 Hz, 2-H), 7.41 (1H, dd, <i>J</i> = 8.8 Hz, 2.0 Hz, 6-H), 6.78 (1H, d, <i>J</i> = 8.4 Hz, 5-H).                                                                                                                                                                  | 100 MHz (DMSO- <i>d</i> <sub>6</sub> ) $\delta_{\text{C}}$ : 170.33 (C-7), 151.49 (C-4), 146.05 (C-3), 123.85 (C-6), 123.27 (C-1), 117.71 (C-2), 115.73 (C-5). | Protocatechuic acid                |

|   |               |                                                        |                                                                                                                                                                                                                    |                              |                                                                                                                                                                                                                                                                                                                                                                                                                                                                                                                                                                                                                                                                                                              |                                                                                                                                       |                                           |
|---|---------------|--------------------------------------------------------|--------------------------------------------------------------------------------------------------------------------------------------------------------------------------------------------------------------------|------------------------------|--------------------------------------------------------------------------------------------------------------------------------------------------------------------------------------------------------------------------------------------------------------------------------------------------------------------------------------------------------------------------------------------------------------------------------------------------------------------------------------------------------------------------------------------------------------------------------------------------------------------------------------------------------------------------------------------------------------|---------------------------------------------------------------------------------------------------------------------------------------|-------------------------------------------|
| 6 | 249, 295, 379 | 289 (12%), 245 (100%), 227 (59%), 199 (32%), 107 (48%) | HRESI-MS (TOF, positive ion) $m/z$ : 290.0663 $[M+H]^+$ (calculated for $C_{14}H_{12}NO_6^+$ 290.0665); 312.0487 $[M+Na]^+$ , (calculated for $C_{14}H_{11}NO_6Na^+$ 312.0484).<br>negative ion: 477.2 $[M-H]^-$ . | $C_{14}H_{11}NO_6$ (289)     | 600 MHz (MeOD- $d_4$ ) $\delta_H$ : 7.88 (2H, d, $J=2.0$ Hz, 2, 2'-H), 7.49 (2H, dd, $J=8.3$ Hz, 2.0 Hz, 6, 6'-H), 6.87 (2H, d, $J=8.3$ Hz, 5, 5'-H).                                                                                                                                                                                                                                                                                                                                                                                                                                                                                                                                                        | 150 MHz (MeOD- $d_4$ ) $\delta_C$ : 170.63 (C-7), 152.98 (C-4), 132.75 (C-3), 124.66 (C-6), 123.40 (C-1), 118.57 (C-2), 115.15 (C-5). | 4,4'-dihydroxy-3,3'-imino-di-benzoic acid |
| 7 | 255, 356      | -                                                      |                                                                                                                                                                                                                    | $C_{21}H_{18}O_{13}$ (478)   | 600 MHz (MeOD- $d_4$ ) $\delta_H$ : 7.99 (1H, d, $J=2.1$ Hz, 2'-H), 7.52 (1H, dd, $J=8.4$ Hz, 2.1 Hz, 6'-H), 6.88 (1H, d, $J=8.4$ Hz, 5'-H), 6.40 (1H, d, $J=2.0$ Hz, 8-H), 6.21 (1H, d, $J=2.0$ Hz, 6-H), 5.44 (1H, d, $J=7.4$ Hz, 1''-H), 3.58-3.65 (4H, m, 2''-H, 3''-H, 4''-H, 5''-H).                                                                                                                                                                                                                                                                                                                                                                                                                   | -                                                                                                                                     | Miquelianin                               |
| 8 | 255, 356      | -                                                      | negative ion: 608.9 $[M-H]^-$ .                                                                                                                                                                                    | $C_{27}H_{30}O_{16}$ (610.5) | 400 MHz (DMSO- $d_6$ ) $\delta_H$ : 10.86 (1H, br s, 7-OH), 9.68 (1H, br s, 3'-OH), 9.18 (1H, br s, 4'-OH), 7.56 (1H, dd, $J=8.4$ Hz, 2.0 Hz, 6'-H), 7.55 (1H, d, $J=2.0$ Hz, 2'-H), 6.84 (1H, d, $J=8.4$ Hz, 5'-H), 6.39 (1H, d, $J=2.0$ Hz, 8-H), 6.19 (1H, d, $J=2.0$ Hz, 6-H), 5.34 (1H, d, $J=7.2$ Hz, 1''-H), 5.28 (1H, d, $J=3.6$ Hz, 2''-OH), 5.11 (1H, d, $J=3.6$ Hz, 3''-OH), 5.07 (1H, d, $J=6.0$ Hz, 4''-OH), 4.53 (1H, d, $J=5.2$ Hz, 4'''-OH), 4.46 (1H, d, $J=4.4$ Hz, 3'''-OH), 4.34-4.40 (2H, m, 1'''-H, 2'''-OH), 3.71 (1H, d, $J=10$ Hz, 6''a-H), 3.22-3.39 (7H, m, 2''H, 3''H, 5''H, 6''bH, 2'''-H, 3'''-H, 5'''-H), 3.04-3.09 (2H, m, 4'''-H, 4''-H), 1.02 (3H, d, $J=6.6$ Hz, 6'''-H). | -                                                                                                                                     | Rutin                                     |

|    |               |                                                                  |                                          |                                                          |                                                                                                                                                                                                                                                                                                                                                                                                                                                                                                                           |                                                                                                                                                                                                                                                                                                                                                                                |            |
|----|---------------|------------------------------------------------------------------|------------------------------------------|----------------------------------------------------------|---------------------------------------------------------------------------------------------------------------------------------------------------------------------------------------------------------------------------------------------------------------------------------------------------------------------------------------------------------------------------------------------------------------------------------------------------------------------------------------------------------------------------|--------------------------------------------------------------------------------------------------------------------------------------------------------------------------------------------------------------------------------------------------------------------------------------------------------------------------------------------------------------------------------|------------|
| 9  | 254, 352      | -                                                                | negative ion: 447.1 [M-H] <sup>-</sup> . | C <sub>21</sub> H <sub>20</sub> O <sub>11</sub><br>(448) | 600 MHz (MeOD- <i>d</i> <sub>4</sub> ) $\delta_{\text{H}}$ : 7.34 (1H, d, <i>J</i> = 2.0 Hz, 2'-H), 7.31 (1H, dd, <i>J</i> = 8.3 Hz, 2.0 Hz, 6'-H), 6.91 (1H, d, <i>J</i> = 8.2 Hz, 5'-H), 6.37 (1H, d, <i>J</i> = 1.7 Hz, 8-H), 6.20 (1H, d, <i>J</i> = 1.9 Hz, 6-H), 5.35 (1H, d, <i>J</i> = 1.0 Hz, 1''-H), 4.22 (1H, dd, <i>J</i> = 2.7 Hz, 1.4 Hz, 2''-H), 3.75 (1H, d, <i>J</i> = 9.3 Hz, 3.1 Hz, 3''-H), 3.40-3.46 (1H, m, 5''-H), 3.33 (1H, d, <i>J</i> = 9.5 Hz, 4''-H), 0.94 (3H, d, <i>J</i> = 6.1 Hz, 6''-H). | 150 MHz (MeOD- <i>d</i> <sub>4</sub> ) $\delta_{\text{C}}$ : 179.82 (C-4), 166.05 (C-7), 163.39 (C-5), 159.48 (C-5), 158.69 (C-2), 149.96 (C-4'), 146.58 (C-3'), 136.39 (C-3), 123.12 (C-1'), 123.01 (C-6'), 117.08 (C-2'), 116.52 (C-5'), 106.05 (C-10), 103.70 (C-1''), 99.96 (C-6), 94.86 (C-8), 73.40 (C-4''), 72.27 (C-3''), 72.19 (C-5''), 72.05 (C-2''), 17.81 (C-6''). | Quercitrin |
| 10 | 255, 306, 368 | 302 (100%), 301 (43%), 274 (13%), 273 (17%), 245(10%), 137 (18%) | negative ion: 300.9 [M-H] <sup>-</sup> . | C <sub>15</sub> H <sub>10</sub> O <sub>7</sub><br>(302)  | 400 MHz (MeOD- <i>d</i> <sub>4</sub> ) $\delta_{\text{H}}$ : 7.72 (1H, d, <i>J</i> = 1.6 Hz, 2'-H), 7.62 (1H, d, <i>J</i> = 8.4 Hz, 2.0 Hz, 6'-H), 6.87 (1H, d, <i>J</i> = 8 Hz, 5'-H), 6.37 (1H, d, <i>J</i> = 1.6 Hz, 8-H), 6.17 (1H, d, <i>J</i> = 2.0 Hz).                                                                                                                                                                                                                                                            | -                                                                                                                                                                                                                                                                                                                                                                              | Quercetin  |

<sup>a</sup> The related references are shown in the manuscript in Section 3.4.

<sup>b</sup> Data not checked.

**Table S3.** Calibration curves of DPPH and ABTS radical inhibition (%) or AUC value by Trolox.

| Antioxidant assay | Calibration curves of radical inhibition (%) by Trolox <sup>a</sup> |                        |                |
|-------------------|---------------------------------------------------------------------|------------------------|----------------|
|                   | Linearity range of Trolox (μM)                                      | Progression            | r <sup>2</sup> |
| DPPH              | 6.25-100                                                            | $y = 0.7456x + 3.6613$ | 0.9999         |
| ABTS              | 0.52-16.67                                                          | $y = 5.8398x - 1.0452$ | 0.9998         |
| ORAC              | 2.00-16.00                                                          | $y = 5.7544x + 10.948$ | 0.9939         |

<sup>a</sup> The calibration curves were created by plotting DPPH and ABTS radical inhibition (%) or net AUC value (ORAC assay) against Trolox concentrations.
